# Supplementary material for: Acceleration of ammonium phosphate hydrolysis using TiO2 microspheres as a catalyst for hydrogen production
Source: Royal Society of Chemistry journal article supplement (doi:10.1039/d0na00204f), 2020-01-01
Supplement: d0na00204f1.pdf [file d0na00204f1.pdf]

## Acceleration of Ammonium Phosphate Hydrolysis Process via TiO<sub>2</sub> Microspheres as A Catalyst for Hydrogen Production

*Ayman H. Zaki<sup>a,\*†</sup>, Ahmed Esmail Shalan<sup>b,e\*†</sup>, Aya El-Shafeay<sup>a</sup>, Yasser M. Gadelhak<sup>a</sup>,  
Enas Ahmed<sup>c</sup>, M. O. Abdel-Salam<sup>d</sup>, M. Sobhi<sup>b</sup>, and S. I. El-dek<sup>a</sup>*

<sup>a</sup> Materials Science and Nanotechnology Department, Faculty of Postgraduate Studies for Advanced Sciences (PSAS), Beni-Suef University, Beni-Suef, Egypt

<sup>b</sup> Central Metallurgical Research and Development Institute, P.O. Box 87, Helwan, 11422, Cairo, Egypt.

<sup>c</sup> Renewable Energy Science and Engineering Department, Faculty of Postgraduate Studies for Advanced Sciences, Beni-Suef University, Egypt

<sup>d</sup> Egyptian Petroleum Research Institute, Nasr City, P.O. 11727, Cairo, Egypt

<sup>e</sup> BCMaterials-Basque Center for Materials, Applications and Nanostructures, Martina Casiano, UPV/EHU Science Park, Barrio Sarriena s/n, Leioa 48940, Spain.

\*Corresponding author: (A. H. Z.) E-mail: [ayman.zaki@psas.bsu.edu.eg](mailto:ayman.zaki@psas.bsu.edu.eg);

(A. E. S.) E-mail: [a.shalan133@gmail.com](mailto:a.shalan133@gmail.com); [ahmed.shalan@bcmaterials.net](mailto:ahmed.shalan@bcmaterials.net)

† The mentioned authors contributed equally to this manuscript.

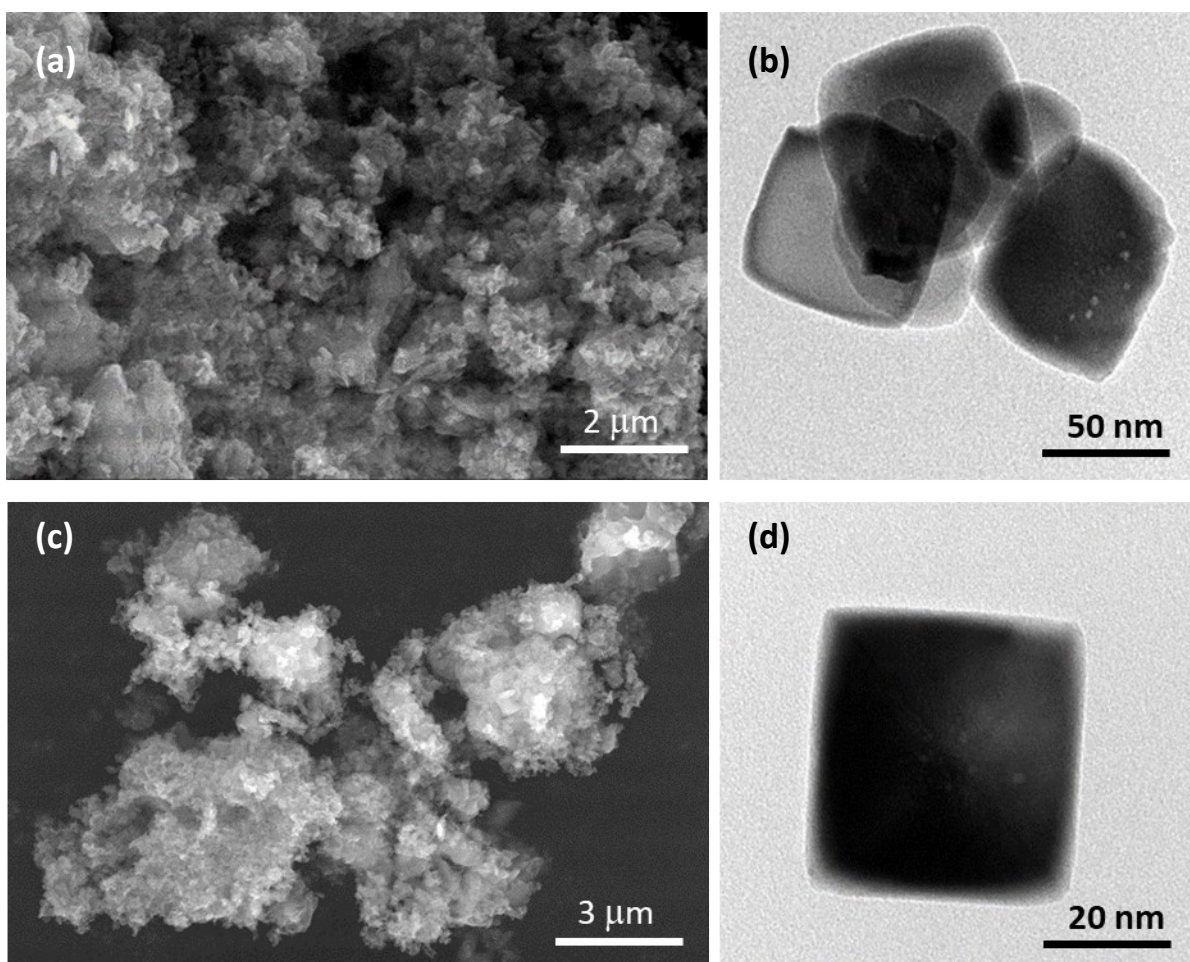

**Figure S1:** (a & c) FESEM and (b & d) HRTEM images of the prepared sample without of Urea additive (u\_0) with different magnifications and positions.



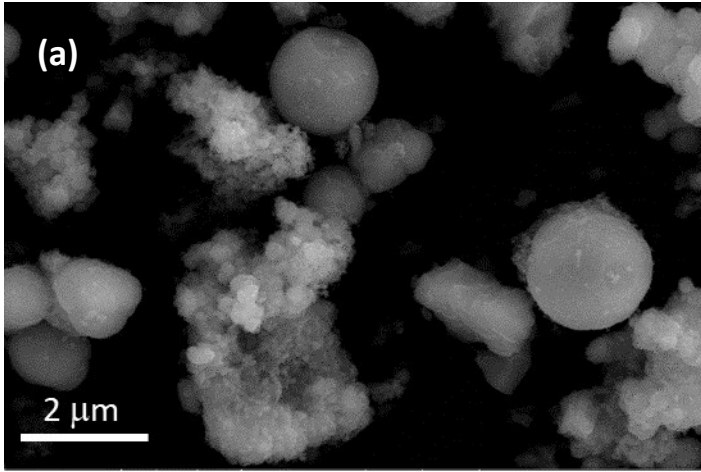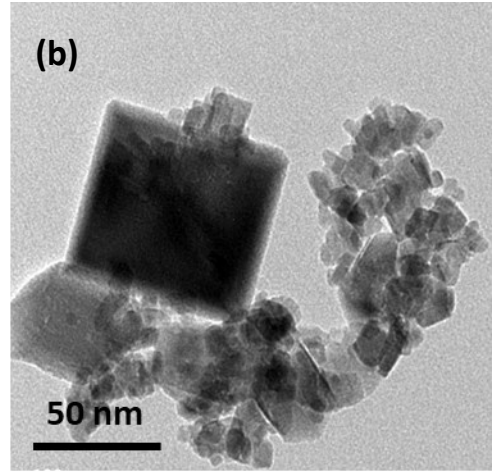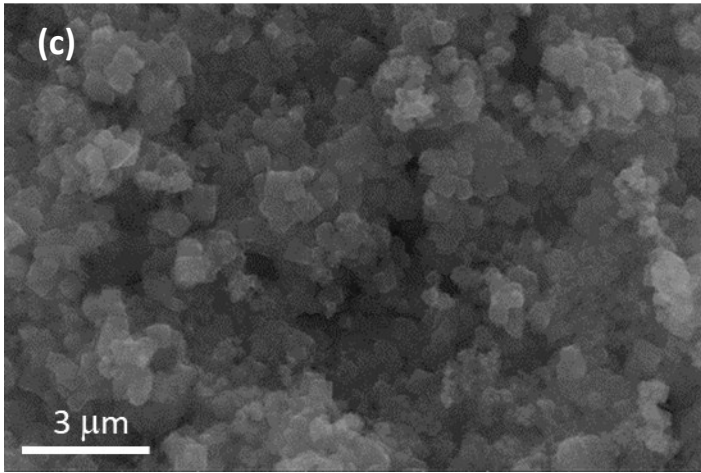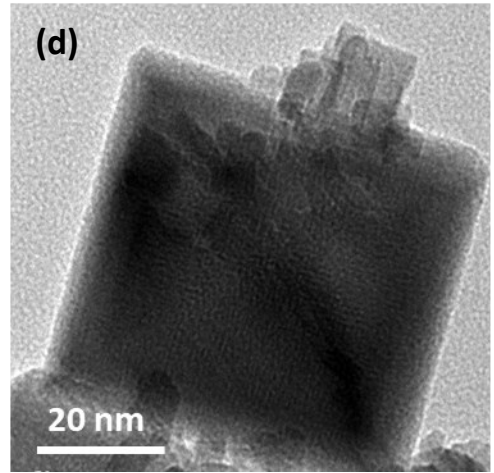

**Figure S2:** (a & c) FESEM and (b & d) HRTEM images of the prepared sample using 20 gm of Urea (u\_20) with different magnifications and positions.

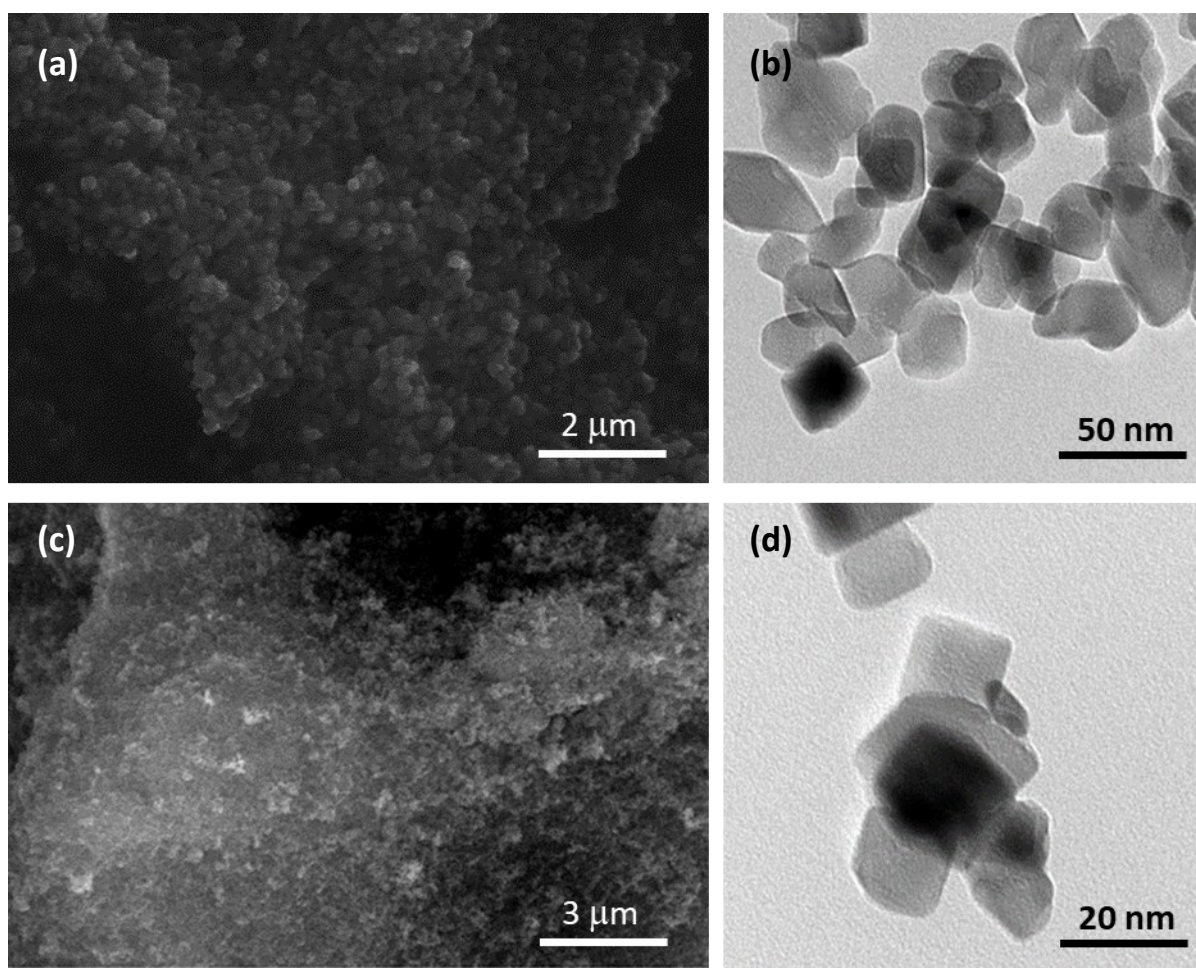

**Figure S3:** (a & c) FESEM and (b & d) HRTEM images of the prepared sample using ammonia instead of Urea additive with different magnifications and positions.
